# Supplementary material for: Integrin-Associated Focal Adhesion Kinase Protects Human Embryonic Stem Cells from Apoptosis, Detachment, and Differentiation
Source: PubMed Central journal article supplement (PMC4983079; doi:10.1016/j.stemcr.2016.07.006), 2016-08-09
Supplement: mmc1.pdf [file mmc1.pdf]

**Stem Cell Reports, Volume 7**

**Supplemental Information**

**Integrin-Associated Focal Adhesion Kinase Protects Human Embryonic Stem Cells from Apoptosis, Detachment, and Differentiation**

**Loriana Vitillo, Melissa Baxter, Banu Iskender, Paul Whiting, and Susan J. Kimber**

SUPPLEMENTAL FIGURES

FIGURE S1

A

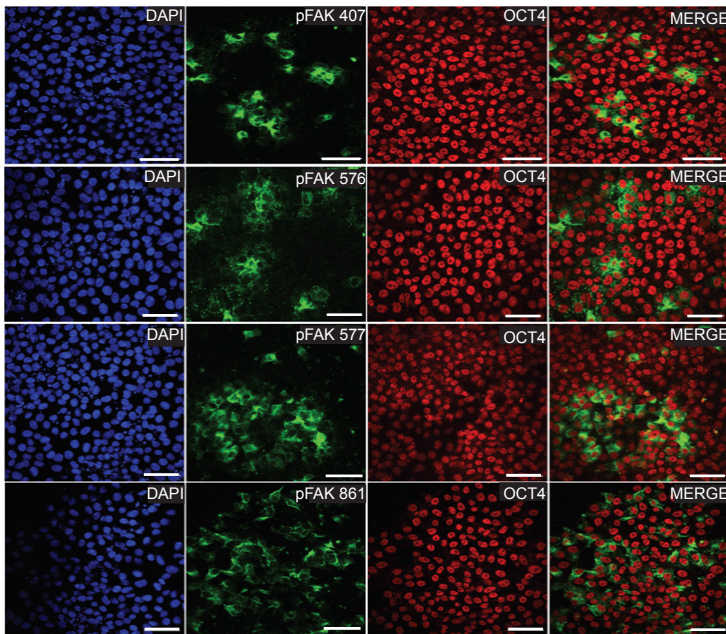

B

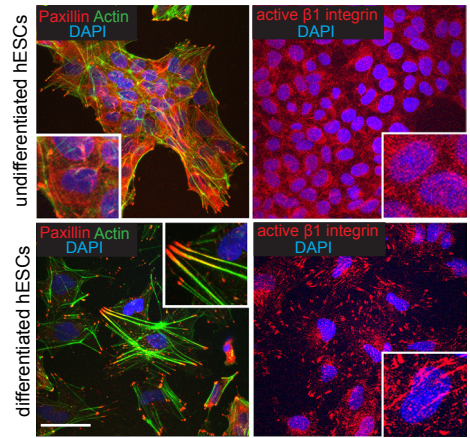

C

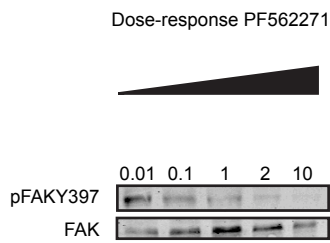

E

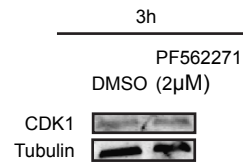

D

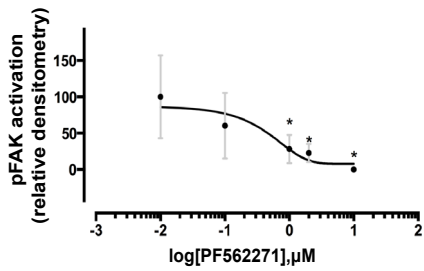

**Figure S1. Matrix-Integrin Binding Activates FAK Signaling Upstream of AKT  
(Related to Figure 1)**

(A) Immunofluorescence images of hESCs cultured on fibronectin and stained with antibodies against OCT4 and pFAKY407, pFAKY576, pFAKY577 or pFAKY861. Scale bars 50  $\mu$ m

(B) Immunofluorescence image of undifferentiated and differentiated hESCs cultured on fibronectin and stained with antibodies against Paxillin, Actin and active  $\beta$ 1-integrin. For differentiation, cells were grown in hESCs media (Baxter et al., 2009) without NT4 and AA for 7 days. Scale bar 50  $\mu$ m

(C) Immunoblot of pFAKY397 and FAK after increasing concentrations of PF562271 inhibitor added for 1 h.

(D) Dose-response curve of pFAKY397 relative to PF562271 concentration added for 1 h. Average of 3 independent experiments. \*indicates  $p < 0.05$ .

(E) Immunoblot of CDK1 and  $\beta$ -tubulin after 3 hr of 2  $\mu$ M PF562271.

Data represented as mean +SEM

**FIGURE S2**

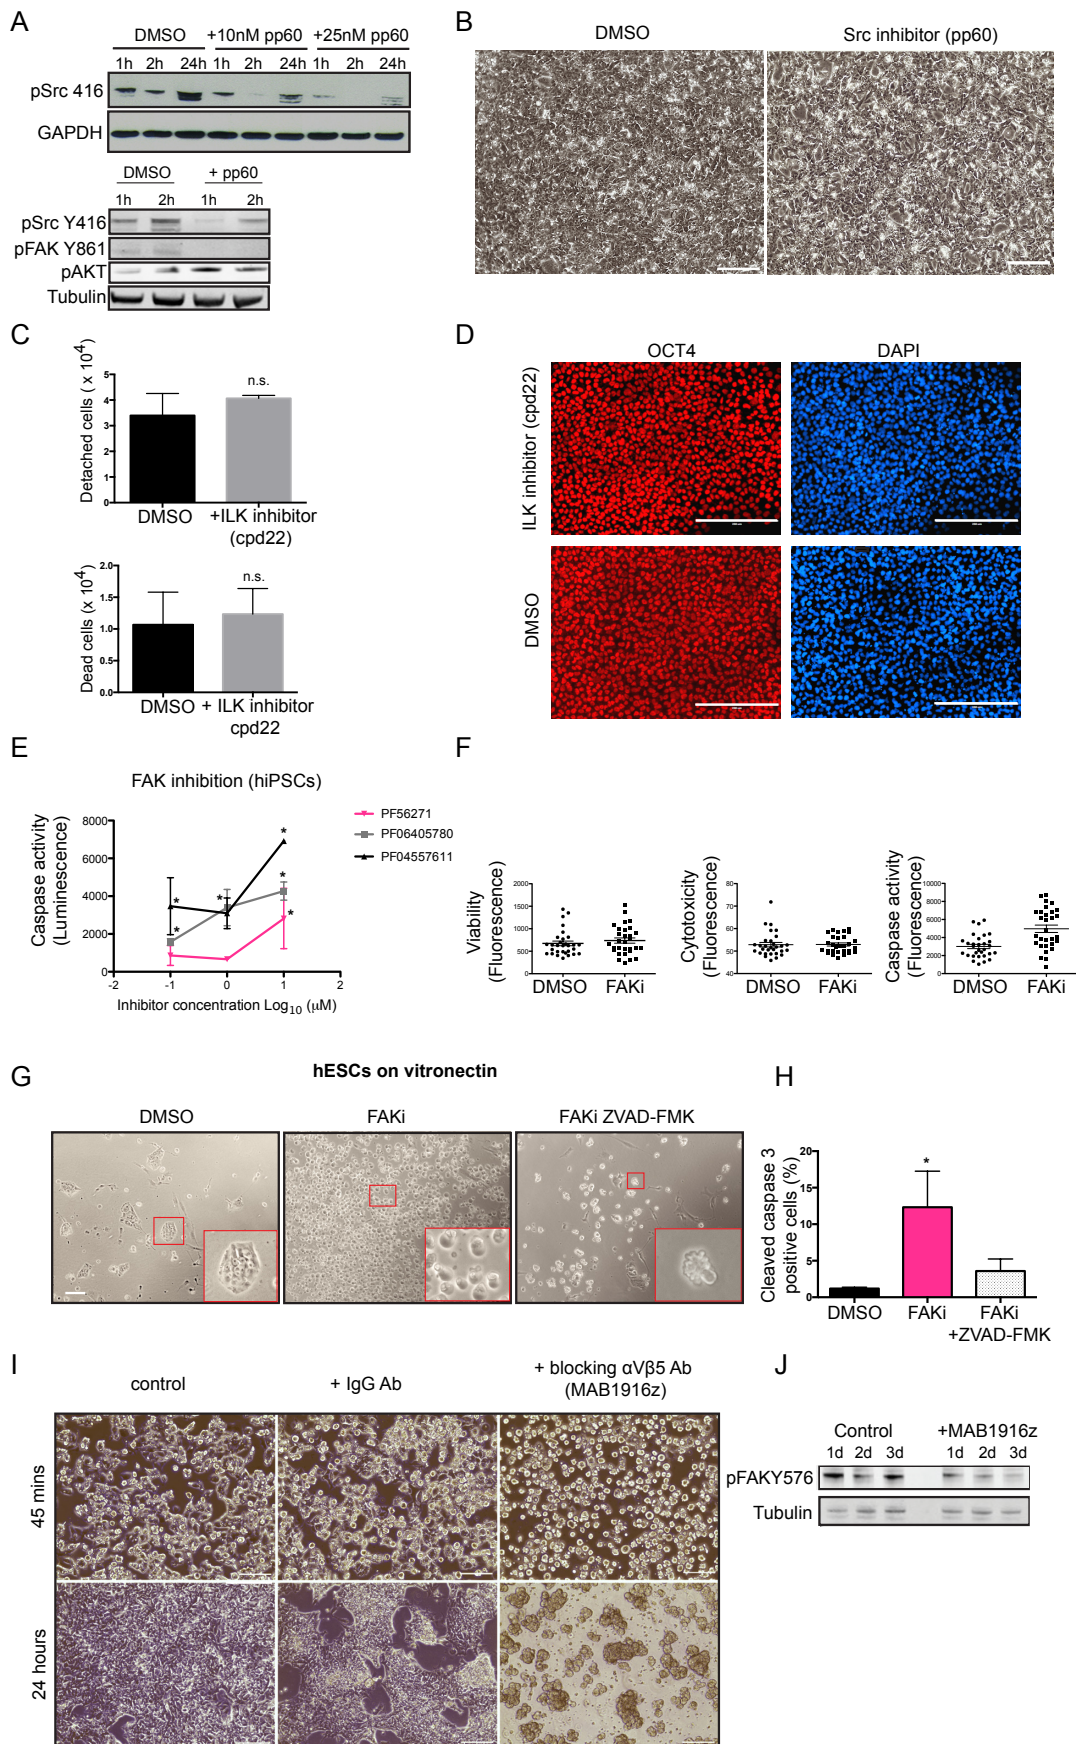

**Figure S2. Inhibition of FAK Signaling Induces Cell Blebbing and a Caspase-Dependent Anoikis (Related to Figure 2)**

- (A) Top: Immunoblot of pSrc416 and GAPDH in hESCs treated with DMSO or Src inhibitor pp60 at 10nM or 25nM for 1h, 2h or 24hr. Bottom: Immunoblot of pSrc416, pFAKY861, pAKT and  $\beta$ -tubulin in hESCs treated with DMSO or pp60 (25nM) for 1 and 2 hr.
- (B) Phase images of hESCs plated on fibronectin for 24 hr in presence of Src inhibitor pp60 (25 nM) or DMSO control. Scale bars 100  $\mu$ m
- (C) Quantification of cell detachment (cell in suspension) and survival (dead cells stained positive with trypan blue) in hESCs treated for 24 hr with 0.4  $\mu$ M of ILK inhibitor cpd22. (n=3 independent experiments).
- (D) Immunofluorescence images of hESCs treated with DMSO or 0.4  $\mu$ M cpd22 for 3 days and stained with antibody against OCT4.
- (E) Caspase activity in hiPSCs treated for 5 hr with the indicated concentrations of FAK inhibitors. \*indicates  $p < 0,05$  (n=3 independent experiments).
- (F) Scatter plots of viability, cytotoxicity and caspase activity measured in parallel in hiPSCs treated with DMSO or 2  $\mu$ M of PF562271 for 5 hr. Each dot represents a well of a 96-well plate.
- (G) Phase images of hESCs cultured on vitronectin substrate and treated for 24 hr with DMSO, FAKi only or with Z-VAD-FMK. Inserts from left to right show: hESCs colony, cells undergoing anoikis and cell blebbing. Scale bar 50  $\mu$ m
- (H) Cleaved-caspase 3 expression in hESCs cultured on vitronectin and treated with DMSO, FAKi only or with Z-VAD-FMK for 24 hr. \*indicates  $p < 0.05$  relative to DMSO (n=3 independent experiments).
- (I) Phase images of hESCs replated on vitronectin for 45 mins or 24 hr in presence of 10  $\mu$ g/ml of MAB1916z or mouse IgG control versus untreated control. Scale bars 100  $\mu$ m.
- (J) Immunoblot of pFAKY576 or  $\beta$ -tubulin in hESCs cultured on vitronectin from 1 to 3 days (3d) with 10  $\mu$ g/ml of IgG control or MAB1916z.

Data represented as mean +SEM

## FIGURE S3

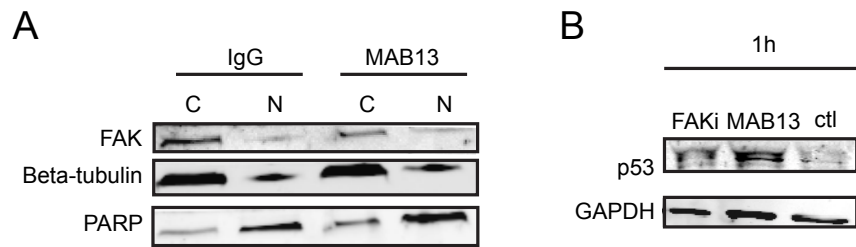

**Figure S3. FAK Localizes in the Nucleus of hESCs and Regulates MDM2/p53 Levels during Anoikis (Related to Figure 3)**

(A) Immunoblot of FAK in the nuclear and cytoplasmic fraction of hESCs treated with IgG control or MAB13 for 6 hr.  $\beta$ -tubulin serves as cytoplasmic marker (C) and PARP as nuclear marker (N).

(B) Immunoblot of p53 and GAPDH in control hESCs versus cells treated with FAKi or MAB13 for 1 hr.

**FIGURE S4**

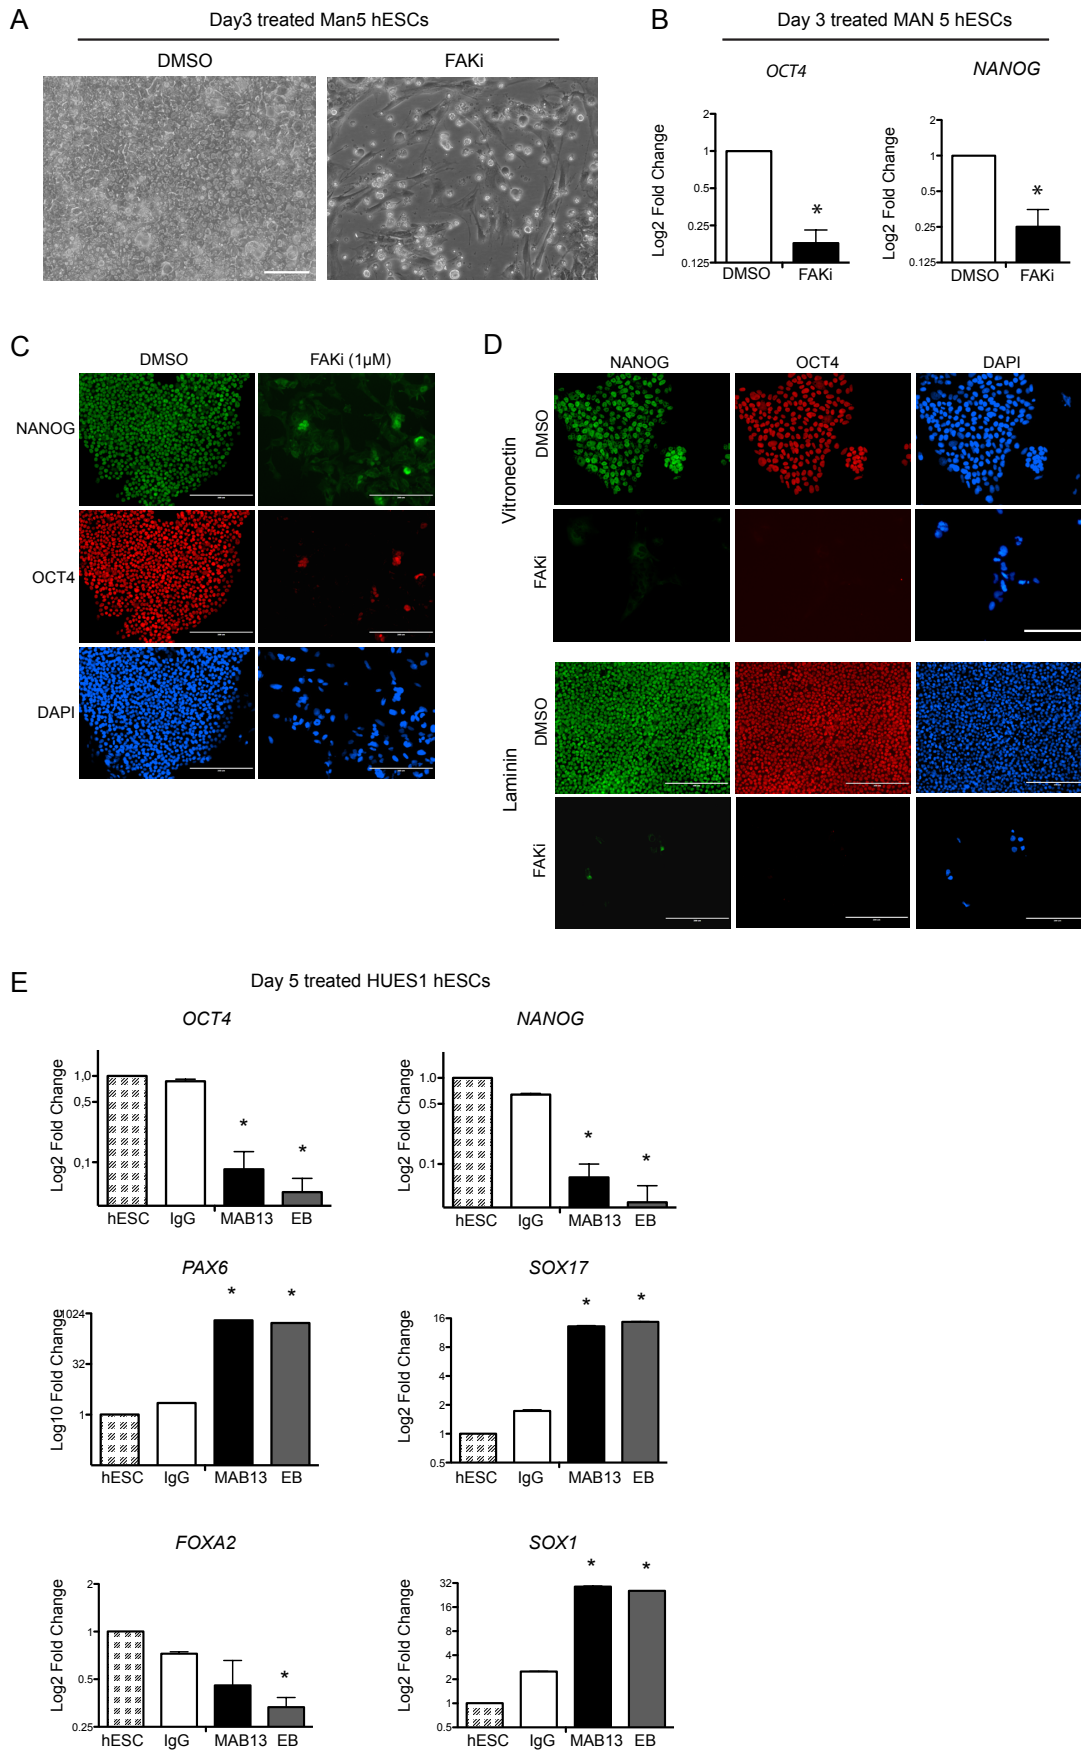



**Figure S4. hESCs Avoid Anoikis by Exiting their Undifferentiated State (Related to Figure 4)**

(A) Phase images of hESCs MAN5 treated with DMSO or 2  $\mu$ M of PF562271 (FAKi) for 3 days. Scale bar 100  $\mu$ m.

(B) Gene expression fold-change of pluripotency markers *NANOG* and *OCT4* in hESC MAN5 treated with DMSO or FAKi for 3 days. \* indicates  $p < 0,05$  (n=3 independent experiments).

(C) Immunofluorescence images of hESCs cultured on fibronectin and treated with DMSO or 1  $\mu$ M PF562271 for 3 days. Cells were costained with DAPI and antibodies against *NANOG* and *OCT4*. Scale bars 200  $\mu$ m.

(D) Immunofluorescence images of hESCs cultured on vitronectin or laminin 521 and treated with DMSO or 2  $\mu$ M PF562271 for 3 days. Cells were costained with DAPI and antibodies against *NANOG* and *OCT4*. Scale bars 200  $\mu$ m.

(E) Gene expression fold-change of pluripotency markers *NANOG*, *OCT4* and differentiation markers *PAX6*, *SOX17*, *FOXA2* and *SOX1* in hESC HUES1 treated with DMSO, FAKi, 10 $\mu$ g of MAB13 or rat IgG for 5 days. \* indicates  $p < 0,05$ . MAB13 relative to IgG, EB relative to hESCs (n=3 independent experiments)

Data represented as mean +SEM



## SUPPLEMENTAL EXPERIMENTAL PROCEDURES

### **Apoptosis assay and Flow Cytometry:**

Apoptosis measurements were performed using the Annexin V-PE and 7-AAD kit (BD Pharmigen) and acquired on a Lab Quanta SC flow cytometer (Beckman Coulter). For Annexin V/NANOG double staining, samples were pre-stained with Annexin V for 15 mins and washed 3 times with PBS 1X prior to fixation. For intracellular staining, cells were fixed in 4% paraformaldehyde at room temperature and permeabilized in 70% MeOH at 4°C. Samples were probed with Nanog-PE or AlexaFluor 488 Isotype control (both from BD Pharmigen) for 30 mins and analysed. Data were analysed using Summit 4.3 (Beckman Coulter).

### **Immunofluorescence:**

hESCs were fixed in 4% paraformaldehyde, blocked with 10% serum matching the species of the secondary antibody and permeabilised with 0.1% TritonX-100. Cells were incubated with primary antibodies dilutions containing 1% serum overnight at 4°C. Cells were washed and incubated with secondary antibodies conjugated with Alexa fluorophores (Invitrogen) and nuclei stained with DAPI (Sigma). Images were taken with Olympus IX71 inverted microscope (Olympus) with a Q-imaging Retiga SRV camera and processed using QCapture Pro (QImaging) and ImageJ 64.

### **Widefield restoration microscopy with Delta Vision:**

hESCs were grown and fixed on glass-bottom culture dishes (35.0/10mm Grainer Bio-one) coated with fibronectin. Images were acquired on a Delta Vision Olympus IX71 microscope (Applied Precision) restoration microscope using a 100x/140 Uplan S Apo objective and the Sedat Quad filter set. The images were collected using a Coolsnap HP (Photometrics) camera with a Z optical spacing of 0.2 µm.

### **Antibodies and reagents:**

Immunofluorescence antibodies were used against: Paxillin (BD Bioscience), F-Actin (Fluorescein phalloidin, Invitrogen), activated β1-integrin 12g10 (gift from prof. M.Humphries, Wellcome Matrix Centre, The University of Manchester), NANOG (R&D Systems); OCT4 (BD Biosciences); FAK clone 4.47 (Millipore); pFAKY397, pFAKY407, pFAKY576, pFAKY577 and pFAKY861 (Invitrogen); p53 (ab131442, Abcam), Cleaved-caspase3 (Asp175, Cell Signalling). Western blotting antibodies were against: FAK, pFAKY397, pFAK576, pSrc416, pAKTSer473, p53, pMDM2, NANOG (all from Cell Signalling); pFAK861 (Invitrogen); CDK1 (R&D); GAPDH 71.1 (Sigma Aldrich); AKT (Invitrogen); pSMAD2 (Millipore); Multiubiquitin Chain MoAb (clone FK2, Cayman chemical); β-tubulin (Li-COR). Secondary antibodies: IRDye 680LT Goat anti-Mouse IgG; IRDye 800CW Goat anti-Rabbit IgG (Li-COR), IRDye 680LT Donkey anti-Goat IgG. Small molecules: FAK inhibitors PF-562271 (Roberts et al., 2008), PF-06405780 (Bunnage et al., 2011), PF-04557611 (Lovering et al., 2012); AKT inhibitors PF-05094152 (Heerding et al., 2008), PF-04907559 (Heerding et al., 2007) and PF-04943582 (Zhu et al., 2007) were all provided by Pfizer. ILK inhibitor cpd22 from Calbiochem. Src inhibitor pp60 (521-533) from Tocris. Caspase inhibitor Z-VAD-FMK from Abcam.

### **Protein extraction and immunoblotting:**

Adherent cells were lysed on ice in RIPA buffer (Sigma) with added protease and phosphatase inhibitors (ROCHE). Protein extracts were quantified using the BCA protein detection kit (Thermo Scientific). Equal protein amounts were separated on 12% poly-acrylamide gel and transferred to a nitrocellulose membrane (Wathman). Membranes were blocked in Odyssey buffer (Li-COR), incubated overnight at 4°C with primary antibody, washed and incubated with IRDye conjugated secondary antibodies for 2 hr at room temperature. Membranes were scanned with the Odyssey detection system (Li-COR).

### **Subcellular fractionation:**

hESCs pellets were lysed in NER-PER extraction reagents (Thermo Scientific). Cell pellet were resuspended in 200 µl of CERI buffer plus protease and phosphatase inhibitors (ROCHE) for 10 mins on ice. CERII buffer was added to the solution, vortexed for 15 mins, incubated 2 mins on ice, vortexed 5 sec and spun at 500 g for 7 mins. Cytoplasmic proteins were collected from the supernatant. The remaining nuclear pellet was washed twice in PBS, spun at 500 g for 7 min and incubated in 50 µl of NER buffer for 40 mins on ice, vortexed every 10 mins. Nuclear proteins were collected in the supernatant after a 16,000 g centrifugation for 10 mins at 4°C.

### **Immunoprecipitation:**

hESCs pellet corresponding to  $5 \times 10^6$  cells was used for each immunoprecipitation condition following the p53 immunocapture kit (ab154470, Abcam). For each immunoprecipitation, 10 µl of p53 beads slurry were used in a 1.5 ml tube incubated under rotation for 16 hr at 4°C.

**Real-time PCR:**

Total RNA was isolated using the RNeasy Mini Kit (Qiagen) and converted to cDNA with the M-MLV reverse transcriptase (Promega). For qPCR mastermixes, power SYBR Green Master Mix (Applied Biosystems) was used and plates were run using the CFX96 Real-Time System (Bio-Rad). mRNA levels were normalized to GAPDH expression and relative expression calculated as fold-change from the untreated control.

Table S1. Primer set used in this study, Related to Figure 4

| <b>GENE</b>     | <b>FORWARD</b>                | <b>REVERSE</b>            |
|-----------------|-------------------------------|---------------------------|
| <i>OCT4</i>     | AGACCATCTGCCGCTTTGAG          | GCAAGGGCCGCAGCTT          |
| <i>NANOG</i>    | GGCTCTGTTTTGCTATATCCCCTAA     | CATTACGATGCAGCAAATACAAGA  |
| <i>GAPDH</i>    | ATGGGGAAGGTGAAGGTCG           | TAAAAGCAGCCCTGGTGACC      |
| <i>PAX6</i>     | CTGGCTAGCGAAAAGCAACAG         | CCCGTTCAACATCCTTAGTTTATCA |
| <i>SOX17</i>    | AGAGATTTGTTTCCCATAGTTGGATT    | TGTTTTGGGACACATTCAAAGCT   |
| <i>SOX1</i>     | GCGGTAACAACACTACAAAAAAGTTGTAA | GCGGAGCTCGTCGCATT         |
| <i>FOXA2</i>    | TTCAGGCCCGGCTAACTCT           | AGTCTCGACCCCCACTTGCT      |
| <i>Gooseoid</i> | GATGCTGCCCTACATGAACGT         | GACAGTGCAGCTGGTTGAGAAG    |

## SUPPLEMENTAL REFERENCES

Baxter, M.A., Camarasa, M.V., Bates, N., Small, F., Murray, P., Edgar, D., and Kimber, S.J. (2009). Analysis of the distinct functions of growth factors and tissue culture substrates necessary for the long-term self-renewal of human embryonic stem cell lines. *Stem Cell Res* 3, 28-38.

Bunnage, M.E., Cook, A.S., Cui, J.J., Dack, K.N., Deal, J.G., Gu, D., He, M., Johnson, P.S., Johnson, T.W., Le, P.T.Q., et al. (2011). Preparation of heterocyclic derivatives such as 2-aminopyridine and 3-aminopyridazine derivatives as anaplastic lymphoma kinase (ALK) inhibitors for the treatment of diseases. *PCT Int. Appl. WO 2011138751 A2 20111110*.

Heerding, D.A., Clark, T.J., Leber, J.D., Safonov, I.G. (2007). 1H-imidazo[4,5-c]pyridin-2-yl derivatives as inhibitors of AKT activity and their therapeutic uses. *PCT Int. Appl. WO 2007058850 A2 20070524*.

Heerding, D.A., Rhodes, N., Leber, J.D., Clark, T.J., Keenan, R.M., Lafrance, L.V., Li, M., Safonov, I.G., Takata, D.T., Venslavsky, J.W., et al. (2008). Identification of 4-(2-(4-aminso-1,2,5-oxadiazol-3-yl)-1-ethyl-7-[(3S)-3-piperidinylmethyl]oxy)-1H-imidazo[4,5-c]pyridin-4-yl)-2-methyl-3-butyn-2-ol (GSK690693), a novel inhibitor of AKT kinase. *J Med Chem* 51, 5663-5679.

Lovering, F., McDonald, J., Whitlock, G.A., Glossop, P.A., Phillips, C., Bent, A., Sabnis, Y., Ryan, M., Fitz, L., Lee, J., et al. (2012). Identification of type-II inhibitors using kinase structures. *Chem Biol Drug Des* 80, 657-664.

Roberts, W.G., Ung, E., Whalen, P., Cooper, B., Hulford, C., Autry, C., Richter, D., Emerson, E., Lin, J., Kath, J., et al. (2008). Antitumor activity and pharmacology of a selective focal adhesion kinase inhibitor, PF-562,271. *Cancer Res* 68, 1935-1944.

Zhu, G.D., Gandhi, V.B., Gong, J., Thomas, S., Woods, K.W., Song, X., Li, T., Diebold, R.B., Luo, Y., Liu, X., et al. (2007). Syntheses of potent, selective, and orally bioavailable indazole-pyridine series of protein kinase B/Akt inhibitors with reduced hypotension. *J Med Chem* 50, 2990-3003.
